# Supplementary material
Source: PubMed Central journal article supplement (PMC5074616)
Supplement: supp_pp.16.00379_PP2016-00379DR3_Supplemental_Materialfigstbls145.pdf [file supp_pp.16.00379_PP2016-00379DR3_Supplemental_Materialfigstbls145.pdf]

1 **SUPPLEMENTAL MATERIALS**

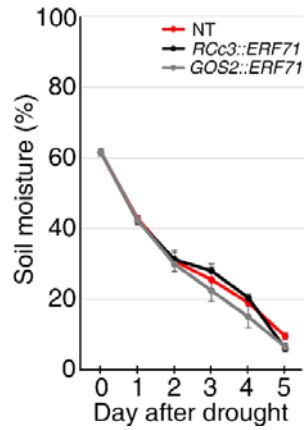

2

3 **Figure S1.** Soil moisture during drought treatment at the vegetative growth stage.

4 Soil moisture percentage during drought treatment described in Figure 1C. Values for each  
5 time point represent the mean  $\pm$  SD of 10 soils on the pots for each genotype, measured by  
6 SM150 Soil Moisture Sensor (AT Delta-T Devices, Cambridge, England).

7

8

9

10

11

12

13

14

15

16

17

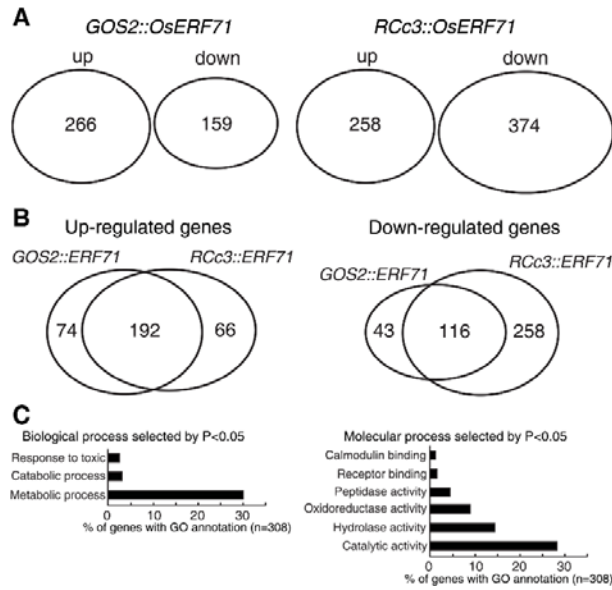

18

19 **Figure S2.** *OsERF71*-regulated genes in *GOS2::OsERF71* and *RCc3::OsERF71* roots.

20 A, Venn diagrams of up- (fold change > 3 and *P* value < 0.05) and down- (fold change < -3  
 21 and *P* value < 0.05) regulated genes based on microarray data from two-week old  
 22 *GOS2::OsERF71* and *RCc3::OsERF71* roots, compared to NT roots.

23 B, Venn diagrams of differentially regulated genes common to *GOS2::OsERF71* and  
 24 *RCc3::OsERF71* roots.

25 C, GO analysis (*P* < 0.05) of the selected 308 genes using the PANTHER Classification  
 26 System.

27

28

29

30

31

32

33

34

35

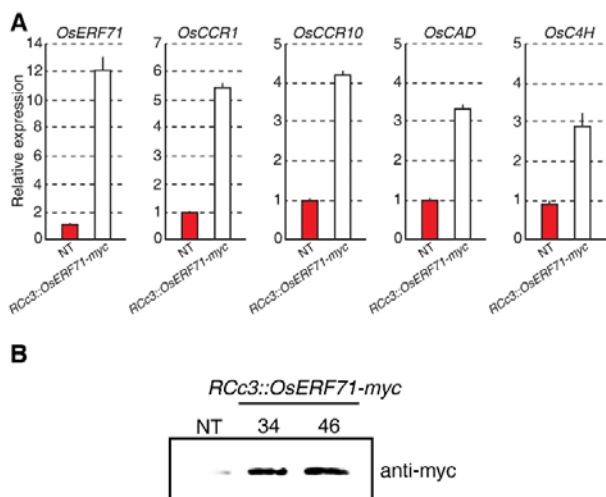

36

37 **Figure S3.** Expression analysis of *RCc3::OsERF71-myc* plants.

38 A, Expression level of *OsERF71-myc* and lignin biosynthesis genes in roots of two-week old  
 39 *RCc3::OsERF71-myc* and NT rice plants by qRT-PCR. *Ubiquitin1* expression was used as an  
 40 internal control. Data are shown as the mean + SD of three biological and two technical  
 41 replicates.

42 B, Western bot analysis of the expression of the *OsERF71-myc* protein in roots of two-week  
 43 old *RCc3::OsERF71-myc* and NT rice plants.

44

45

46

47

48

49

50

51

52

53

54

55

56

57

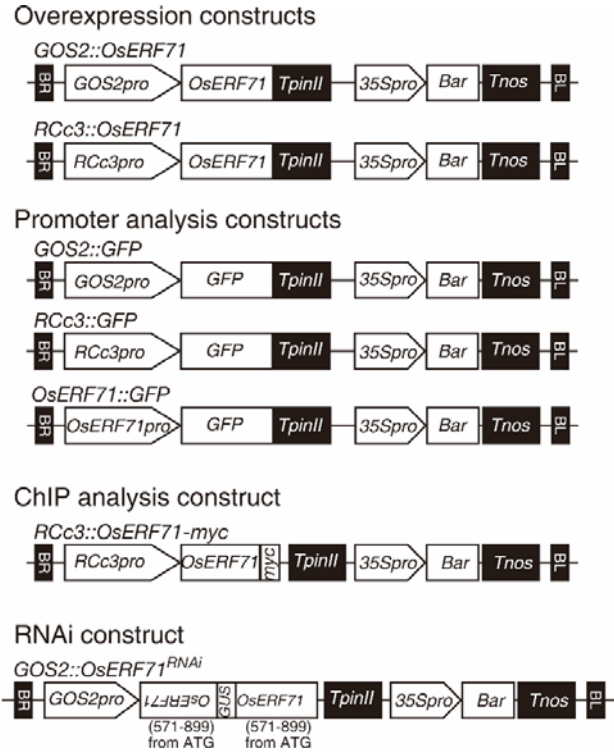

58  
59  
60  
61  
62  
63  
64  
65  
66  
67  
68  
69  
70  
71  
72  
73  
74  
75  
76

**Figure S4.** Vector maps for *GOS2::OsERF71*, *RCc3::OsERF71*, *GOS2::GFP*, *RCc3::GFP*, *OsERF71::GFP*, *RCc3::OsERF71-myc*, and *GOS2::OsERF71<sup>RNAi</sup>*.

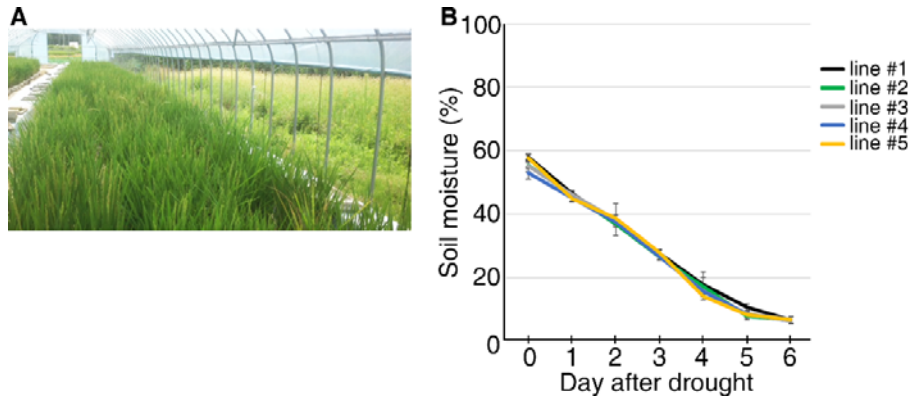

77

78 **Figure S5.** Photograph of the field experiments and water content in soils during drought  
 79 treatment in the field.

80 A, Photograph of a rain-off shelter to cover rice plants before drought treatment.

81 B, Soil moisture percentage during drought treatment in the field. Rice plants for each  
 82 genotype were randomly located on 5 different lines in a rain-off shelter. Rice plants at a  
 83 transition stage from vegetative to reproductive development were exposed to drought stress  
 84 conditions by removing water. During the drought stress, water contents in soils were  
 85 monitored by randomly selected 20 soil spots on each line for each time point. Values for  
 86 each time point represent the mean  $\pm$  SD of randomly selected 20 soil spots on each line. Soil  
 87 moisture was measured by SM150 Soil Moisture Sensor (AT Delta-T Devices, Cambridge,  
 88 England).

89

90

91

92

93

94

95

96

97

98

99

100

101

102

103 **Table S1.** Agronomic traits of *RCc3::OsERF71* and *GOS2::OsERF71* transgenic rice plants  
 104 grown in the field.

**Table S1.** Agronomic traits of *RCc3::OsERF71* and *GOS2::OsERF71* transgenic rice plants grown in the field.

| Genotypes                   | Grain filling rate (%)      |                |                        |                |                        |                | Total grain weight (g)          |                |                        |                |                        |                |
|-----------------------------|-----------------------------|----------------|------------------------|----------------|------------------------|----------------|---------------------------------|----------------|------------------------|----------------|------------------------|----------------|
|                             | 2009 (T <sub>5</sub> )      |                | 2010 (T <sub>6</sub> ) |                | 2011 (T <sub>7</sub> ) |                | 2009 (T <sub>5</sub> )          |                | 2010 (T <sub>6</sub> ) |                | 2011 (T <sub>7</sub> ) |                |
|                             | N <sup>a</sup>              | D <sup>b</sup> | N <sup>a</sup>         | D <sup>b</sup> | N <sup>a</sup>         | D <sup>b</sup> | N <sup>a</sup>                  | D <sup>b</sup> | N <sup>a</sup>         | D <sup>b</sup> | N <sup>a</sup>         | D <sup>b</sup> |
| NT(Nipponbare)              | 87.57                       | 49.78          | 81.39                  | 47.61          | 86.83                  | 46.83          | 22.39                           | 8.46           | 29.05                  | 11.56          | 24.01                  | 13.13          |
| <i>RCc3::ERF71-12</i>       | 88.60                       | <b>54.99</b>   | 80.78                  | <b>55.55</b>   | 87.29                  | <b>57.51</b>   | 22.43                           | <b>10.75</b>   | 29.92                  | <b>14.60</b>   | 25.09                  | <b>16.79</b>   |
| <i>P</i> value <sup>c</sup> | 0.843                       | 0.013          | 0.73                   | 0.011          | 0.739                  | 0.001          | 0.975                           | 0.014          | 0.589                  | 0.024          | 0.433                  | 0.009          |
| <i>RCc3::ERF71-34</i>       | 87.99                       | <b>59.71</b>   | 80.49                  | <b>52.02</b>   | 82.42                  | <b>58.37</b>   | 22.72                           | <b>10.99</b>   | 30.90                  | <b>15.30</b>   | 23.66                  | <b>17.10</b>   |
| <i>P</i> value <sup>c</sup> | 0.91                        | 0.016          | 0.609                  | 0.003          | 0.811                  | 0.000          | 0.782                           | 0.007          | 0.249                  | 0.006          | 0.054                  | 0.004          |
| <i>RCc3::ERF71-49</i>       | 88.84                       | <b>61.55</b>   | 81.99                  | <b>55.26</b>   | 87.18                  | <b>53.79</b>   | 21.40                           | <b>10.50</b>   | 31.58                  | <b>15.15</b>   | 25.96                  | <b>16.20</b>   |
| <i>P</i> value <sup>c</sup> | 0.276                       | 0.004          | 0.73                   | 0.000          | 0.80                   | 0.028          | 0.403                           | 0.027          | 0.114                  | 0.008          | 0.159                  | 0.027          |
| <i>GOS2::ERF71-20</i>       | 88.03                       | 45.71          | 81.30                  | 43.74          | 86.57                  | 45.20          | 23.27                           | 8.33           | 31.70                  | 10.63          | 26.54                  | 13.34          |
| <i>P</i> value <sup>c</sup> | 0.14                        | 0.319          | 0.961                  | 0.083          | 0.85                   | 0.61           | 0.459                           | 0.885          | 0.098                  | 0.492          | 0.068                  | 0.875          |
| <i>GOS2::ERF71-34</i>       | 86.77                       | 49.81          | 81.71                  | 39.22          | 88.72                  | 47.09          | 20.82                           | 8.05           | 29.01                  | 10.89          | 26.62                  | 13.80          |
| <i>P</i> value <sup>c</sup> | 0.142                       | 0.995          | 0.852                  | 0.111          | 0.176                  | 0.933          | 0.188                           | 0.654          | 0.978                  | 0.62           | 0.059                  | 0.627          |
| <i>GOS2::ERF71-49</i>       | 88.96                       | 47.19          | 80.94                  | 47.52          | 85.59                  | 47.20          | 23.91                           | 7.69           | 31.62                  | 10.63          | 25.98                  | 12.57          |
| <i>P</i> value <sup>c</sup> | 0.132                       | 0.525          | 0.8                    | 0.33           | 0.373                  | 0.905          | 0.204                           | 0.398          | 0.11                   | 0.49           | 0.15                   | 0.687          |
| Genotypes                   | Culm length (cm)            |                |                        |                |                        |                | Panicle length (cm)             |                |                        |                |                        |                |
|                             | 2009 (T <sub>5</sub> )      |                | 2010 (T <sub>6</sub> ) |                | 2011 (T <sub>7</sub> ) |                | 2009 (T <sub>5</sub> )          |                | 2010 (T <sub>6</sub> ) |                | 2011 (T <sub>7</sub> ) |                |
|                             | N <sup>a</sup>              | D <sup>b</sup> | N <sup>a</sup>         | D <sup>b</sup> | N <sup>a</sup>         | D <sup>b</sup> | N <sup>a</sup>                  | D <sup>b</sup> | N <sup>a</sup>         | D <sup>b</sup> | N <sup>a</sup>         | D <sup>b</sup> |
| NT(Nipponbare)              | 71.89                       | 67.04          | 89.50                  | 56.47          | 79.27                  | 66.72          | 19.68                           | 19.04          | 21.03                  | 18.58          | 19.83                  | 20.12          |
| <i>RCc3::ERF71-12</i>       | 72.97                       | <b>71.12</b>   | <b>97.56</b>           | 53.31          | <b>87.07</b>           | <b>73.60</b>   | <b>21.30</b>                    | 19.60          | <b>22.48</b>           | <b>22.78</b>   | 19.70                  | <b>18.88</b>   |
| <i>P</i> value <sup>c</sup> | 0.07                        | 0.00           | 0.00                   | 0.05           | 0.00                   | 0.00           | 0.00                            | 0.48           | 0.00                   | 0.00           | 0.56                   | 0.01           |
| <i>RCc3::ERF71-34</i>       | 71.88                       | <b>75.23</b>   | <b>94.53</b>           | <b>60.67</b>   | <b>82.17</b>           | 69.86          | 19.65                           | 19.57          | <b>22.73</b>           | <b>23.11</b>   | 19.93                  | 19.99          |
| <i>P</i> value <sup>c</sup> | 0.99                        | 0.00           | 0.00                   | 0.01           | 0.00                   | 0.09           | 0.94                            | 0.52           | 0.00                   | 0.00           | 0.66                   | 0.76           |
| <i>RCc3::ERF71-49</i>       | 71.77                       | <b>72.13</b>   | <b>94.87</b>           | <b>61.83</b>   | <b>83.80</b>           | 65.43          | 20.17                           | 19.00          | 21.20                  | 19.50          | 19.67                  | <b>19.12</b>   |
| <i>P</i> value <sup>c</sup> | 0.83                        | 0.00           | 0.00                   | 0.00           | 0.00                   | 0.49           | 0.12                            | 0.96           | 0.63                   | 0.15           | 0.47                   | 0.02           |
| <i>GOS2::ERF71-20</i>       | 72.85                       | <b>72.04</b>   | 89.80                  | 58.94          | <b>88.77</b>           | 65.26          | <b>20.63</b>                    | 19.07          | 21.43                  | <b>19.94</b>   | <b>19.07</b>           | <b>19.06</b>   |
| <i>P</i> value <sup>c</sup> | 0.12                        | 0.00           | 0.75                   | 0.13           | 0.00                   | 0.43           | 0.00                            | 0.98           | 0.24                   | 0.03           | 0.00                   | 0.02           |
| <i>GOS2::ERF71-34</i>       | <b>74.22</b>                | <b>71.67</b>   | <b>94.23</b>           | 55.14          | <b>83.03</b>           | 69.51          | <b>21.15</b>                    | 18.56          | <b>21.87</b>           | 19.06          | 19.63                  | 20.13          |
| <i>P</i> value <sup>c</sup> | 0.00                        | 0.00           | 0.00                   | 0.40           | 0.00                   | 0.13           | 0.00                            | 0.55           | 0.02                   | 0.45           | 0.38                   | 0.99           |
| <i>GOS2::ERF71-49</i>       | <b>74.70</b>                | 68.98          | 90.53                  | <b>59.94</b>   | <b>84.90</b>           | 65.08          | 20.20                           | 18.92          | 21.23                  | 19.64          | 20.07                  | 19.93          |
| <i>P</i> value <sup>c</sup> | 0.00                        | 0.11           | 0.28                   | 0.03           | 0.00                   | 0.38           | 0.10                            | 0.88           | 0.56                   | 0.10           | 0.31                   | 0.66           |
| Genotypes                   | Number of panicles per hill |                |                        |                |                        |                | Number of spikelets per panicle |                |                        |                |                        |                |
|                             | 2009 (T <sub>5</sub> )      |                | 2010 (T <sub>6</sub> ) |                | 2011 (T <sub>7</sub> ) |                | 2009 (T <sub>5</sub> )          |                | 2010 (T <sub>6</sub> ) |                | 2011 (T <sub>7</sub> ) |                |
|                             | N <sup>a</sup>              | D <sup>b</sup> | N <sup>a</sup>         | D <sup>b</sup> | N <sup>a</sup>         | D <sup>b</sup> | N <sup>a</sup>                  | D <sup>b</sup> | N <sup>a</sup>         | D <sup>b</sup> | N <sup>a</sup>         | D <sup>b</sup> |
| NT(Nipponbare)              | 9.71                        | 11.24          | 13.93                  | 12.06          | 11.90                  | 15.30          | 83.28                           | 74.20          | 107.65                 | 104.75         | 98.17                  | 87.82          |
| <i>RCc3::ERF71-12</i>       | <b>10.63</b>                | 11.39          | 14.16                  | 11.06          | 13.10                  | 16.25          | 90.44                           | <b>94.60</b>   | <b>119.64</b>          | 110.44         | 94.44                  | 84.00          |
| <i>P</i> value <sup>c</sup> | 0.036                       | 0.753          | 0.773                  | 0.134          | 0.063                  | 0.333          | 0.196                           | 0.000          | 0.009                  | 0.523          | 0.428                  | 0.497          |
| <i>RCc3::ERF71-34</i>       | 9.77                        | 11.79          | 14.13                  | 12.39          | <b>13.20</b>           | 14.63          | 86.08                           | 78.46          | 107.14                 | 118.54         | 91.74                  | 88.21          |
| <i>P</i> value <sup>c</sup> | 0.903                       | 0.251          | 0.789                  | 0.616          | 0.044                  | 0.486          | 0.625                           | 0.370          | 0.905                  | 0.123          | 0.170                  | 0.944          |
| <i>RCc3::ERF71-49</i>       | 10.37                       | 11.29          | <b>15.67</b>           | 11.44          | 12.80                  | <b>18.00</b>   | 86.86                           | <b>83.78</b>   | 112.02                 | 121.32         | 92.96                  | 78.54          |
| <i>P</i> value <sup>c</sup> | 0.135                       | 0.911          | 0.021                  | 0.358          | 0.163                  | 0.006          | 0.518                           | 0.045          | 0.314                  | 0.065          | 0.266                  | 0.100          |
| <i>GOS2::ERF71-20</i>       | 10.44                       | 11.54          | 14.03                  | 13.61          | <b>13.53</b>           | <b>17.67</b>   | <b>100.21</b>                   | 82.44          | 113.34                 | 106.31         | <b>87.37</b>           | <b>66.18</b>   |
| <i>P</i> value <sup>c</sup> | 0.103                       | 0.528          | 0.894                  | 0.933          | 0.012                  | 0.016          | 0.003                           | 0.084          | 0.190                  | 0.861          | 0.022                  | 0.000          |
| <i>GOS2::ERF71-34</i>       | <b>11.33</b>                | <b>12.73</b>   | <b>16.07</b>           | <b>11.89</b>   | 11.17                  | <b>13.33</b>   | 89.03                           | 78.18          | 103.65                 | 104.97         | 98.37                  | 82.99          |
| <i>P</i> value <sup>c</sup> | 0.000                       | 0.003          | 0.005                  | 0.021          | 0.255                  | 0.044          | 0.299                           | 0.413          | 0.355                  | 0.980          | 0.967                  | 0.391          |
| <i>GOS2::ERF71-49</i>       | <b>11.27</b>                | <b>11.00</b>   | 14.67                  | 12.08          | 12.53                  | <b>13.29</b>   | <b>99.15</b>                    | <b>84.77</b>   | 107.32                 | 99.15          | 91.56                  | 91.26          |
| <i>P</i> value <sup>c</sup> | 0.000                       | 0.621          | 0.328                  | 0.802          | 0.325                  | 0.040          | 0.004                           | 0.027          | 0.940                  | 0.531          | 0.158                  | 0.541          |
| Genotypes                   | Number of panicles per hill |                |                        |                |                        |                | Number of spikelets per panicle |                |                        |                |                        |                |
|                             | 2009 (T <sub>5</sub> )      |                | 2010 (T <sub>6</sub> ) |                | 2011 (T <sub>7</sub> ) |                | 2009 (T <sub>5</sub> )          |                | 2010 (T <sub>6</sub> ) |                | 2011 (T <sub>7</sub> ) |                |
|                             | N <sup>a</sup>              | D <sup>b</sup> | N <sup>a</sup>         | D <sup>b</sup> | N <sup>a</sup>         | D <sup>b</sup> | N <sup>a</sup>                  | D <sup>b</sup> | N <sup>a</sup>         | D <sup>b</sup> | N <sup>a</sup>         | D <sup>b</sup> |
| NT(Nipponbare)              | 938.62                      | 861.91         | 1513.20                | 1239.83        | 1126.10                | 1320.70        | 26.20                           | 20.42          | 19.55                  | 20.82          | 20.82                  | 14.64          |
| <i>RCc3::ERF71-12</i>       | 949.57                      | <b>1064.48</b> | 1671.12                | 1197.50        | 1217.60                | 1316.83        | 26.97                           | 19.94          | 19.32                  | 21.39          | 21.39                  | 14.11          |
| <i>P</i> value <sup>c</sup> | 0.795                       | 0.001          | 0.112                  | 0.633          | 0.136                  | 0.963          | 0.348                           | 0.280          | 0.623                  | 0.866          | 0.866                  | 0.913          |
| <i>RCc3::ERF71-34</i>       | 934.57                      | 914.21         | 1506.27                | <b>1453.39</b> | 1201.07                | 1267.45        | 26.38                           | 20.72          | 20.15                  | 21.32          | 21.32                  | 13.75          |
| <i>P</i> value <sup>c</sup> | 0.928                       | 0.359          | 0.942                  | 0.017          | 0.221                  | 0.525          | 0.833                           | 0.051          | 0.182                  | 0.882          | 0.882                  | 0.938          |
| <i>RCc3::ERF71-49</i>       | 894.27                      | 944.04         | <b>1737.47</b>         | 1340.39        | 1184.47                | 1366.37        | 26.83                           | <b>19.30</b>   | 20.01                  | 26.93          | 26.93                  | 15.28          |
| <i>P</i> value <sup>c</sup> | 0.294                       | 0.151          | 0.019                  | 0.257          | 0.340                  | 0.585          | 0.441                           | 0.001          | 0.304                  | 0.070          | 0.070                  | 0.807          |
| <i>GOS2::ERF71-20</i>       | <b>1043.48</b>              | 953.50         | 1584.30                | 1254.22        | 1174.80                | <b>1152.71</b> | <b>22.91</b>                    | 19.78          | <b>20.57</b>           | 21.81          | 21.81                  | 16.90          |
| <i>P</i> value <sup>c</sup> | 0.016                       | 0.109          | 0.452                  | 0.871          | 0.426                  | 0.046          | 0.000                           | 0.260          | 0.024                  | 0.769          | 0.769                  | 0.557          |
| <i>GOS2::ERF71-34</i>       | 1007.23                     | <b>982.00</b>  | 1675.53                | <b>1415.17</b> | 1092.63                | <b>1099.20</b> | 25.65                           | 20.58          | <b>20.45</b>           | 21.70          | 21.70                  | 15.03          |
| <i>P</i> value <sup>c</sup> | 0.105                       | 0.036          | 0.087                  | 0.050          | 0.584                  | 0.009          | 0.494                           | 0.240          | 0.047                  | 0.794          | 0.794                  | 0.596          |
| <i>GOS2::ERF71-49</i>       | <b>984.59</b>               | 923.83         | 1566.47                | 1148.83        | 1139.83                | 1184.04        | <b>24.67</b>                    | 20.87          | <b>21.45</b>           | 20.87          | 20.87                  | 14.09          |
| <i>P</i> value <sup>c</sup> | 0.000                       | 0.278          | 0.573                  | 0.305          | 0.822                  | 0.104          | 0.000                           | 0.519          | 0.000                  | 0.989          | 0.989                  | 0.903          |

<sup>a</sup>Normal growth conditions; <sup>b</sup>Drought growth conditions; <sup>c</sup>One-way ANOVA. Each parameter value represents the mean (n = 30). Numbers in boldface indicate a significant difference ( $P < 0.05$ )

105

106

107

108 **Table S2.** List of up- and down-regulated genes from *GOS2::OsERF71* and *RCc3::OsERF71*  
 109 microarray compared to NT (fold > 3, fold < -3, *P* < 0.05).

110 **Attached an Excel file**

111

112 **Table S3.** List of up- and down-regulated genes common between *RCc3::OsERF71* and  
 113 *GOS2::OsERF71* (fold > 3, fold < -3, *P* < 0.05) compared with NT.

114 **Attached an Excel file**

115

116 **Table S4.** List of stress inducible and cell wall-associated genes up-regulated (fold > 3) by  
 117 both *GOS2::OsERF71* and *RCc3::OsERF71* based on microarray data.

| <b>Table S4.</b> List of stress inducible and cell wall-associated genes up-regulated (fold > 3) by both <i>GOS2::OsERF71</i> and <i>RCc3::OsERF71</i> based on microarray data |              |                      |                             |                      |                             |
|---------------------------------------------------------------------------------------------------------------------------------------------------------------------------------|--------------|----------------------|-----------------------------|----------------------|-----------------------------|
| Gene name <sup>a</sup>                                                                                                                                                          | ID           | <i>GOS2::OsERF71</i> |                             | <i>RCc3::OsERF71</i> |                             |
|                                                                                                                                                                                 |              | Fold change          | <i>P</i> value <sup>b</sup> | Fold change          | <i>P</i> value <sup>b</sup> |
| Stress inducible genes                                                                                                                                                          |              |                      |                             |                      |                             |
| <i>USP</i>                                                                                                                                                                      | Os07g0673400 | 7.03                 | 2.01E-05                    | 7.38                 | 9.74E-06                    |
| <i>USP</i>                                                                                                                                                                      | Os05g0355400 | 5.87                 | 5.12E-05                    | 4.79                 | 5.07E-05                    |
| <i>USP</i>                                                                                                                                                                      | Os03g0305400 | 3.08                 | 6.12E-05                    | 3.53                 | 3.79E-05                    |
| <i>LEA</i>                                                                                                                                                                      | Os01g0705200 | 6.38                 | 4.92E-05                    | 4.97                 | 5.05E-05                    |
| <i>LEA</i>                                                                                                                                                                      | Os05g0349800 | 4.12                 | 4.91E-05                    | 3.16                 | 5.78E-05                    |
| <i>HSP</i>                                                                                                                                                                      | Os01g0606900 | 3.60                 | 6.34E-05                    | 3.70                 | 4.70E-05                    |
| <i>OSR</i>                                                                                                                                                                      | Os03g0830500 | 4.85                 | 2.11E-05                    | 4.57                 | 1.35E-05                    |
| <i>ASRI</i>                                                                                                                                                                     | Os01g0959100 | 3.13                 | 1.04E-04                    | 4.44                 | 4.95E-05                    |
| <i>CYP450</i>                                                                                                                                                                   | Os10g0515900 | 5.05                 | 5.19E-05                    | 4.08                 | 5.40E-05                    |
| <i>CYP450</i>                                                                                                                                                                   | Os04g0560100 | 3.67                 | 4.96E-05                    | 3.85                 | 3.38E-05                    |
| <i>CYP450</i>                                                                                                                                                                   | Os11g0151400 | 3.39                 | 5.34E-05                    | 3.47                 | 4.00E-05                    |
| <i>NCED</i>                                                                                                                                                                     | Os07g0154100 | 34.71                | 3.47E-06                    | 35.87                | 1.41E-06                    |
| Cell wall-associated genes                                                                                                                                                      |              |                      |                             |                      |                             |
| <i>EXP</i>                                                                                                                                                                      | Os10g0542400 | 4.2                  | 3.59E-05                    | 4.46                 | 2.07E-05                    |
| <i>XTH</i>                                                                                                                                                                      | Os02g0280300 | 4.61                 | 2.19E-05                    | 5.71                 | 7.68E-06                    |
| <i>PE</i>                                                                                                                                                                       | Os03g0309400 | 6.46                 | 2.32E-05                    | 4.65                 | 2.53E-05                    |
| <i>CHI</i>                                                                                                                                                                      | Os11g0701000 | 12.12                | 9.55E-06                    | 15.44                | 4.32E-06                    |
| <i>CHI</i>                                                                                                                                                                      | Os11g0701500 | 10.07                | 1.68E-05                    | 12.44                | 6.16E-06                    |
| <i>CHI</i>                                                                                                                                                                      | Os02g0605900 | 5.83                 | 5.92E-05                    | 4.64                 | 6.09E-05                    |
| <i>CHI</i>                                                                                                                                                                      | Os11g0702100 | 5.48                 | 1.88E-05                    | 4.60                 | 1.35E-05                    |
| <i>CHI</i>                                                                                                                                                                      | Os11g0701800 | 5.44                 | 2.97E-05                    | 5.52                 | 1.87E-05                    |
| <i>CHI</i>                                                                                                                                                                      | Os01g0660200 | 5.37                 | 1.87E-05                    | 4.20                 | 1.48E-05                    |
| <i>CHI</i>                                                                                                                                                                      | Os10g0542900 | 4.45                 | 5.16E-05                    | 4.44                 | 4.00E-05                    |
| <i>CHI</i>                                                                                                                                                                      | Os08g0518900 | 3.66                 | 3.93E-05                    | 4.51                 | 1.72E-05                    |
| <i>CHI</i>                                                                                                                                                                      | Os11g0701400 | 3.64                 | 9.42E-05                    | 3.88                 | 7.16E-05                    |
| <i>CHI</i>                                                                                                                                                                      | Os08g0518800 | 3.50                 | 4.73E-05                    | 3.02                 | 4.57E-05                    |

<sup>a</sup>Gene name: *USP*, Universal stress protein; *LEA*, Late embryogenesis abundant protein; *HSP*, Heat shock protein; *OSR*, Oxidative stress response protein; *ASRI*, Abscisic stress ripening protein 1; *CYP450*, Cytochrome p450; *NCED*, 9-cis-epoxycarotenoid dioxygenase; *EXP*, Expansin; *XTH*, Xyloglucan endotransglycosylase; *PE*, Pectinesterase; *CHI*, Chitinase. <sup>b</sup>*P*-value was carried by one-way ANOVA.

118

119

120

121 **Table S5.** List of gene specific primers for qRT-PCR and ChIP-qPCR.

| <b>Table S5.</b> List of gene specific primers for qRT-PCR and ChIP-qPCR |                        |                        |
|--------------------------------------------------------------------------|------------------------|------------------------|
| Target gene (ID)                                                         | Forward primers        | Reverse primers        |
| Gene expression for qRT PCR                                              |                        |                        |
| <i>OsERF71</i> (Os06g0194000)                                            | GACAGGTGTTGATGACTCCGC  | GGGTGTCAATCGACTCATCCG  |
| <i>OsCCR1</i> (Os02g0808800)                                             | GAACCAGAGGCTCAAGGATT   | CATAGGACCGCCTCATTCAA   |
| <i>OsCCR10</i> (Os02g0811800)                                            | TTGTCACGGTGGCACAACAG   | ATATGCCGCCGCTGTCTATGT  |
| <i>OsCAD</i> (Os04g0612700)                                              | TTCGTCGTCGACATCGGCAA   | GGACCTGCAATCCTGCAAAG   |
| <i>OsC4H</i> (Os02g0467000)                                              | TGGTGAGGAGCTTCGAGATG   | TGAGTTCAGGCAGAGATGGG   |
| <i>OsPAL</i> (Os04g0518400)                                              | AGTGCTCAAGGAGTGGAAC    | ACAGCATCAGCTAAGCACATC  |
| <i>OsUBI1</i> (Os06g0681400)                                             | ATGGAGCTGCTGCTGTTCTA   | TTCTTCCATGCTGCTCTACC   |
| Promoter amplification for ChIP-qPCR                                     |                        |                        |
| <i>OsCCR1</i> -P1                                                        | GCTTCGTGATCCCCCTCGTC   | TCGCCCCGAATACTGGGC     |
| <i>OsCCR1</i> -P2                                                        | CGGCCTTGCGATGTGATGC    | GGACGACAAGAGGAAGATAGC  |
| <i>OsCCR1</i> -P3                                                        | GACGGCACTCCGTTTCGC     | TGTGAGACTAGCGTGTCTGG   |
| <i>OsCCR1</i> -P4                                                        | TGCAGGTATAAATAGCGGCCG  | CGCTGACCAGTTACTGTCAC   |
| <i>OsCCR10</i> -P1                                                       | GGAGGAGGAGGGAGTAGATTC  | CCGTTGCTCCAGTCTGCAC    |
| <i>OsCCR10</i> -P2                                                       | GTGCAGACTGGAGCAACGG    | GCATCAGCCATGGAGTGCC    |
| <i>OsCCR10</i> -P3                                                       | CCCTACCAACCCACGAC      | GTTCGAGCTCGAGTGAGGC    |
| <i>OsCCR10</i> -P4                                                       | GCCTCACTCGAGCTCGAAC    | GGACGACATGGTTGATGCTCTG |
| <i>OsCAD</i> -P1                                                         | CGATTCGGTCCCACAATCTTCG | GTACCACGACAGCACGACC    |
| <i>OsCAD</i> -P2                                                         | GGTCGTGCTGTCGTGGTAC    | TGCGCGCTGACGCTACTC     |
| <i>OsCAD</i> -P3                                                         | GCCAACTCGAGAGTGACGTC   | AGTAGCCAGTGGCGGCTTG    |
| <i>OsCAD</i> -P4                                                         | GCTCAAGACACTGGCGGAG    | TCGTCGTCGGCGCCATTG     |
| <i>OsC4H</i> -P1                                                         | CGATTCGGTCCCACAATCTTCG | GTACCACGACAGCACGACC    |
| <i>OsC4H</i> -P2                                                         | CACGTCTCTCCTCCATTCCG   | CAGTACGTGGGAAACGGCTC   |
| <i>OsC4H</i> -P3                                                         | TTCGCCGCATCTCTTCGTGC   | TGGGTCGGGTGCCGTTGG     |
| <i>OsC4H</i> -P4                                                         | CGCTATATAAGCACGCCACGG  | CTAGACCCGCTCACTGGC     |

122
